# Supplementary material
Source: PubMed Central journal article supplement (PMC390294)

### Supplementary information.

**Processing of clustered DNA damage generates additional DSB in mammalian cells post-irradiation**, Melanie Gulston, Catherine de Lara, Terry Jenner, Emma Davis and Peter O'Neill, Medical Research Council, Radiation and Genome Stability Unit, Harwell, Oxfordshire OX11 0RD, England.

Figure 1S. Dependence of the induction of DSB, presented as %FAR, in V79-4 cells on dose of  $^{60}\text{Co}$   $\gamma$ -radiation using either a proteinase-K lysis at 37 °C for 24 h (●, see Materials and Methods) or a salt lysis in 2M NaCl at 4 °C throughout (○, see reference 7 for details).

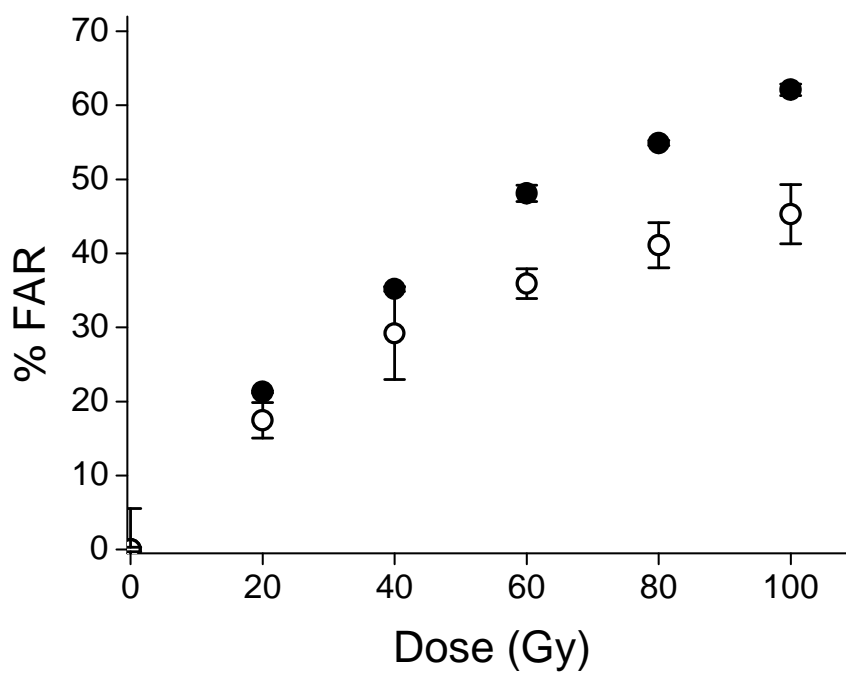

Supplement: nar_32_4_1602__1.pdf [file nar_32_4_1602__1.pdf]
